# Supplementary material for: Misidentification of Burkholderia pseudomallei, China
Source: PubMed Central journal article supplement (PMC7920660; doi:10.3201/eid2703.191769), 2021-03
Supplement: 19-1769-Techapp-s1.pdf [file 19-1769-Techapp-s1.pdf]

# Misidentification of *Burkholderia pseudomallei*, China

## Appendix

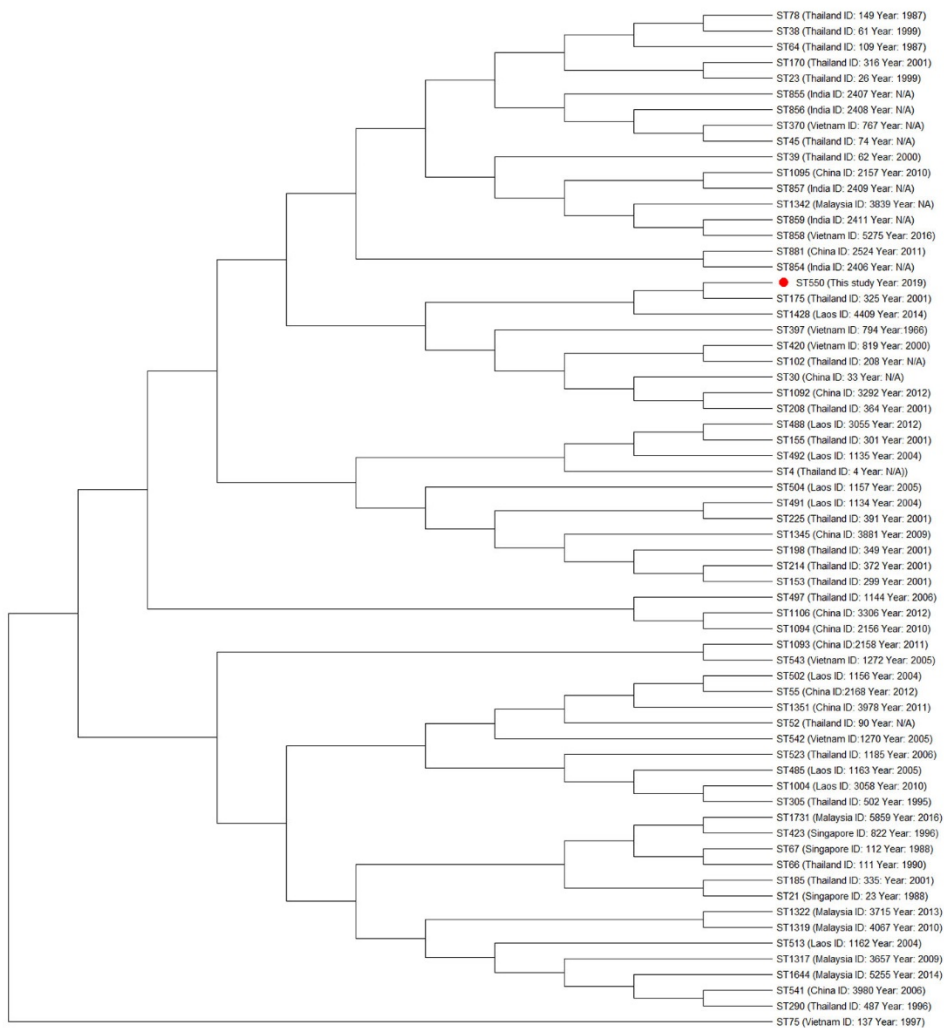

**Appendix Figure.** Phylogeny of 65 *Burkholderia pseudomallei* sequence type 550 isolates from countries in Asia. Red dot indicates isolate from this study, China, 2019. NA, no information available.
